# Supplementary material for: An “off–on–off” fluorescent probe for the sequential detection of Zn2+ and hydrogen sulfide in aqueous solution
Source: Royal Society of Chemistry journal article supplement (doi:10.1039/c3nj01487h), 2014-01-01
Supplement: c3nj01487h.pdf [file c3nj01487h.pdf]

## **An “off-on-off” fluorescent probe for sequential detection of Zn<sup>2+</sup> and hydrogen sulfide in aqueous solution**

Zhengping Dong\*, Xuandung Le, Panpan Zhou, Chunxu Dong, Jiantai Ma\*

*College of Chemistry and Chemical Engineering, Gansu Provincial Engineering Laboratory for Chemical Catalysis, Lanzhou University, Lanzhou, PR China.*

*E-mail address: dongzhp@lzu.edu.cn (Zhengping Dong), majiantai@lzu.edu.cn (Jiantai Ma).*

*Tel.: +86 0931 8912577; fax: +86 0931 8912582.*

1. Fig. S1. <sup>1</sup>H NMR of compound

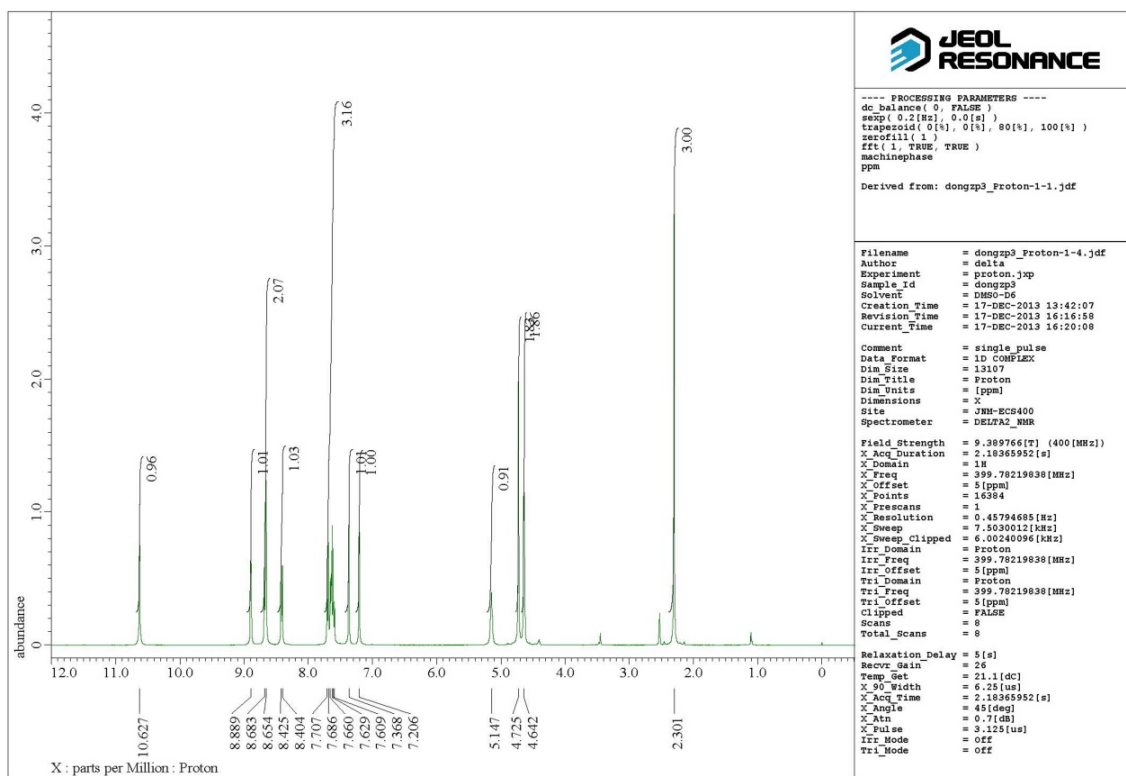

2. Fig. S2. <sup>13</sup>C NMR of compound L

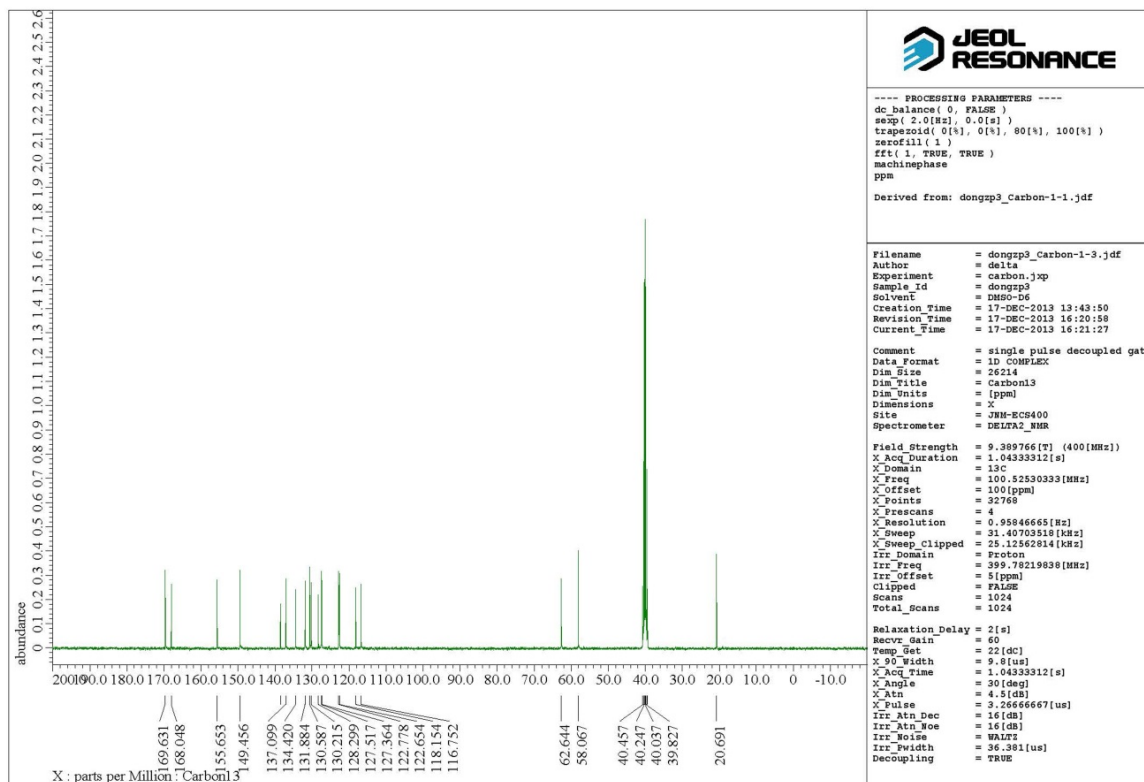

### 3. Fig. S3. The optimization of the solvent ratio.

The optimization of the solvent ratio has been carried out. To simulate the biological environment and to get the best fluorescence intensity, the solvent has been selected as CH<sub>3</sub>CN/Tris-HCl, 50 mM Tris, 50:50, v/v, pH 7.2.

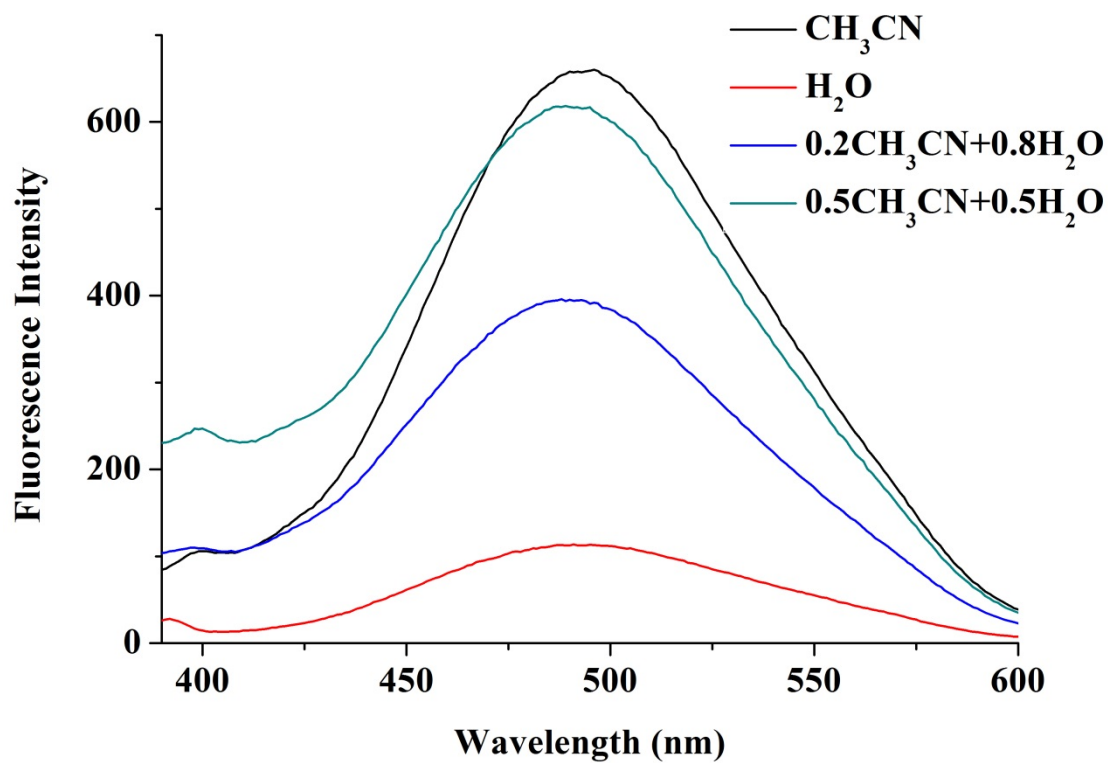

Fig. S3 Fluorescence spectra of LI (10 μM) in the solution with different solvent ratio in the presence of 20 eq. of Zn<sup>2+</sup>. λ<sub>ex</sub> = 345 nm.
